# Supplementary material for: Impact of Atrial Fibrillation on Outcome in Takotsubo Syndrome: Data From the International Takotsubo Registry
Source: PubMed Central journal article supplement — J Am Heart Assoc. 2021 Jul 28;10(15):e014059. doi: 10.1161/JAHA.119.014059 (PMC8475688; doi:10.1161/jaha.119.014059), 2021-07-28

# **SUPPLEMENTAL MATERIAL**

**Figure S1. Description of triggering factors in takotsubo syndrome patients with and without atrial fibrillation.**

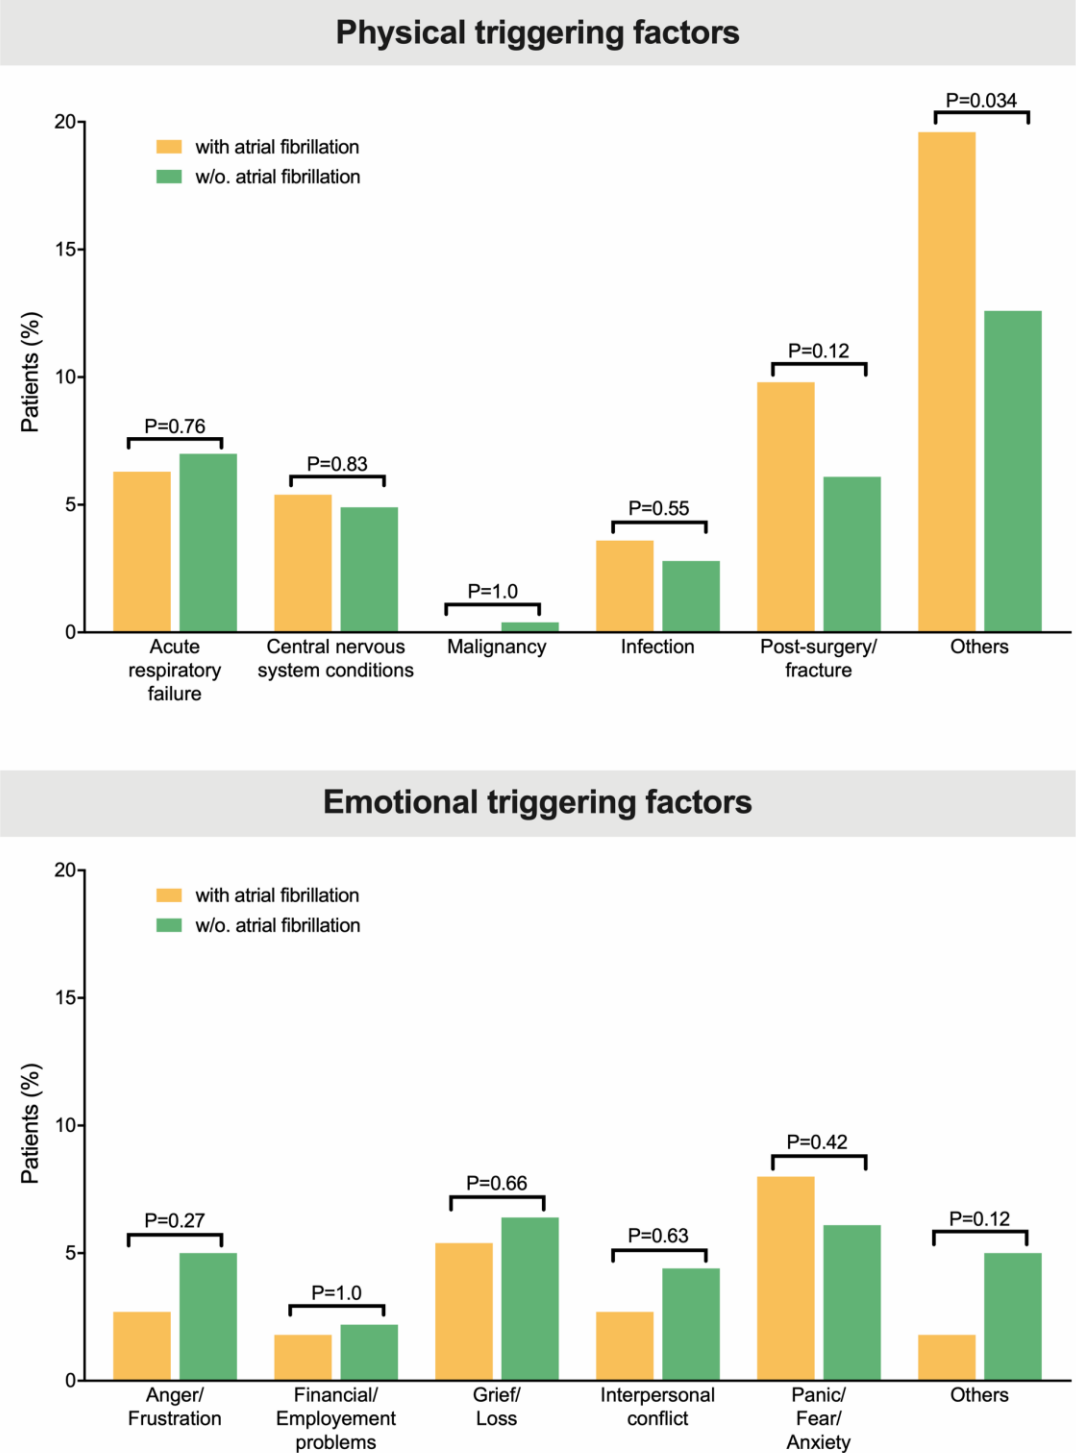

Supplement: JAH3-10-e014059-s001.pdf [file JAH3-10-e014059-s001.pdf]
